# Supplementary material for: Autistic traits are associated with lower perceived executive function but not poorer executive function task performance in the general population: Complementary meta-analytic evidence
Source: Research Square preprint supplement (doi:10.21203/rs.3.rs-6870128/v1), 2025-06-18
Supplement: Supplementary file 1 [file 3ba10268b6d90c61bae22121.docx]

**Supplementary Analyses**

**Relationships between Autistic Traits and Other Executive Function Processes**

Some studies investigated the relationships between autistic traits and other executive functions (EFs), including emotional control (*k* = 6)​, initiation (*k* = 6)​, planning (*k* = 6)​, monitoring (*k* = 5), reasoning (*k* = 4), verbal fluency (*k* = 4), and decision-making (*k* = 1)​​​​. Random-effects meta-analyses and robust Bayesian meta-analyses were conducted for all these processes, except for decision-making, which was examined in only one study.

For emotional control, a random-effects meta-analysis was conducted on six studies, which included a total of 909 individuals with mean ages of 18.4 to 41.6 years. The measures included the Emotional control score of the Behavior Rating inventory of Executive Function (BRIEF; *k* = 5) and the Impulse Control score of the Executive Function Index (*k* = 1). Autistic traits were measured using the Broad Autism Phenotype Questionnaire (BAPQ; *k* = 3), Social Responsiveness Scale (SRS; *k* = 2), and Autism Spectrum Quotient (AQ; *k* = 1). We found a significant negative correlation between autistic traits and planning (Supplementary Figure 5), *z'* = -.32 (*r* = -.31), *p* = .007, 95% CI [-.51, -.13]. True heterogeneity in the effect sizes reported by different studies was significant, *I²* = 78%, *p* < .001. In addition, a robust Bayesian meta-analysis revealed a Bayes factor (BF10)of 1.29, indicating anecdotal evidence supporting the alternative hypothesis (H1) over the null hypothesis (H0).

For initiation, a random-effects meta-analysis was conducted on six studies, which included a total of 909 individuals with mean ages of 18.4 to 41.6 years. The measures included the BRIEF Initiate score (*k* = 5) and the Motivational Drive score of the Executive Function Index (*k* = 1). Autistic traits were measured using the BAPQ (*k* = 3), SRS (*k* = 2), and AQ (*k* = 1). We found a significant negative correlation between autistic traits and initiation (Supplementary Figure 6), *z'* = -.38 (*r* = -.36), *p* = .008, 95% CI [-.61, -.15]. True heterogeneity in the effect sizes was significant, *I²* = 85%, *p* < .001. In addition, a robust Bayesian meta-analysis revealed a BF10 of 1.35, indicating anecdotal evidence supporting H1 over H0.

For planning, a random-effects meta-analysis was conducted on six studies, which included a total of 635 individuals with mean ages of 18.4 to 41.6 years. The measures included the BRIEF Plan/Organize score (*k* = 5) and the Strategic Planning score of the Executive Function Index (*k* = 1). Autistic traits were measured using the BAPQ (*k* = 3), SRS (*k* = 2), and AQ (*k* = 1). We found a significant negative correlation between autistic traits and planning (Supplementary Figure 7), *z'* = -.46 (*r* = -.43), *p* < .001, 95% CI [-.60, -.33]. There was no significant true heterogeneity in the effect sizes, *I²* = 44%, *p* = .20. Additionally, a robust Bayesian meta-analysis revealed a BF10 of 17.54, indicating strong evidence supporting H1 over H0.

For monitoring, a random-effects meta-analysis was conducted on five studies, which included a total of 635 individuals with mean ages of 18.4 to 41.6 years. All used the BRIEF Task Monitor score (*k* = 5). Autistic traits were measured using the BAPQ (*k* = 3) and SRS (*k* = 2). We found a significant negative correlation between autistic traits and monitoring (Supplementary Figure 8), *z'* = -.43 (*r* = -.41), *p* < .002, 95% CI [-.59, -.27]. True heterogeneity in the effect sizes was not significant, *I²* = 55%, *p* = .072. In addition, a robust Bayesian meta-analysis revealed a BF10 of 7.64, indicating substantial evidence supporting H1 over H0.

For reasoning, a random-effects meta-analysis was conducted on four studies, which involved 12,322 participants with mean ages of 20.6 to 61.3 years. All used task measures, which included the Raven Colored Progressive Matrices (*k* = 3) and the verbal reasoning Task (*k* = 1). Autistic traits were measured using the AQ (*k* = 3) and PROTECT AST screener questions (*k* = 1). The correlation between autistic traits and reasoning was not significant (Supplementary Figure 9), *z’* = .02 (*r* = .02), *p* = .73, 95% CI [-.13, .17]. True heterogeneity in the effect sizes was not significant, *I²* = 57% *p* = .32. Additionally, a robust Bayesian meta-analysis revealed a BF10 of 0.24, indicating substantial evidence favoring H0 over H1.

For verbal fluency, a random-effects meta-analysis was conducted on four studies, which involved a total of 303 participants with mean ages of 20.6 to 73.1 years. The letter fluency score was used across studies (*k* = 4). Autistic traits were measured using the AQ (*k* = 2) and BAPQ (*k* = 2). The analysis revealed a nonsignificant correlation between autistic traits and verbal fluency (Supplementary Figure 10), *z'* = -.02 (*r* = -.02), *p* = .72, 95% CI [-.16, .12]. There was no significant true heterogeneity in the effect sizes, *I²* = 11%, *p* = .67. Additionally, a robust Bayesian meta-analysis revealed a BF10 of 0.15, indicating substantial evidence in favor of H0 against H1.

For decision-making, a study with 44 adults examined the relationship between autistic traits and the net score on the Iowa Gambling Task. A significant negative relationship was reported, *r* = -.30, *p* = .025.

**Supplementary Figures**

**Supplementary Figure 1**

*Funnel Plot for the Effect Sizes of the Relationships between Autistic Traits and Overall Executive Function*


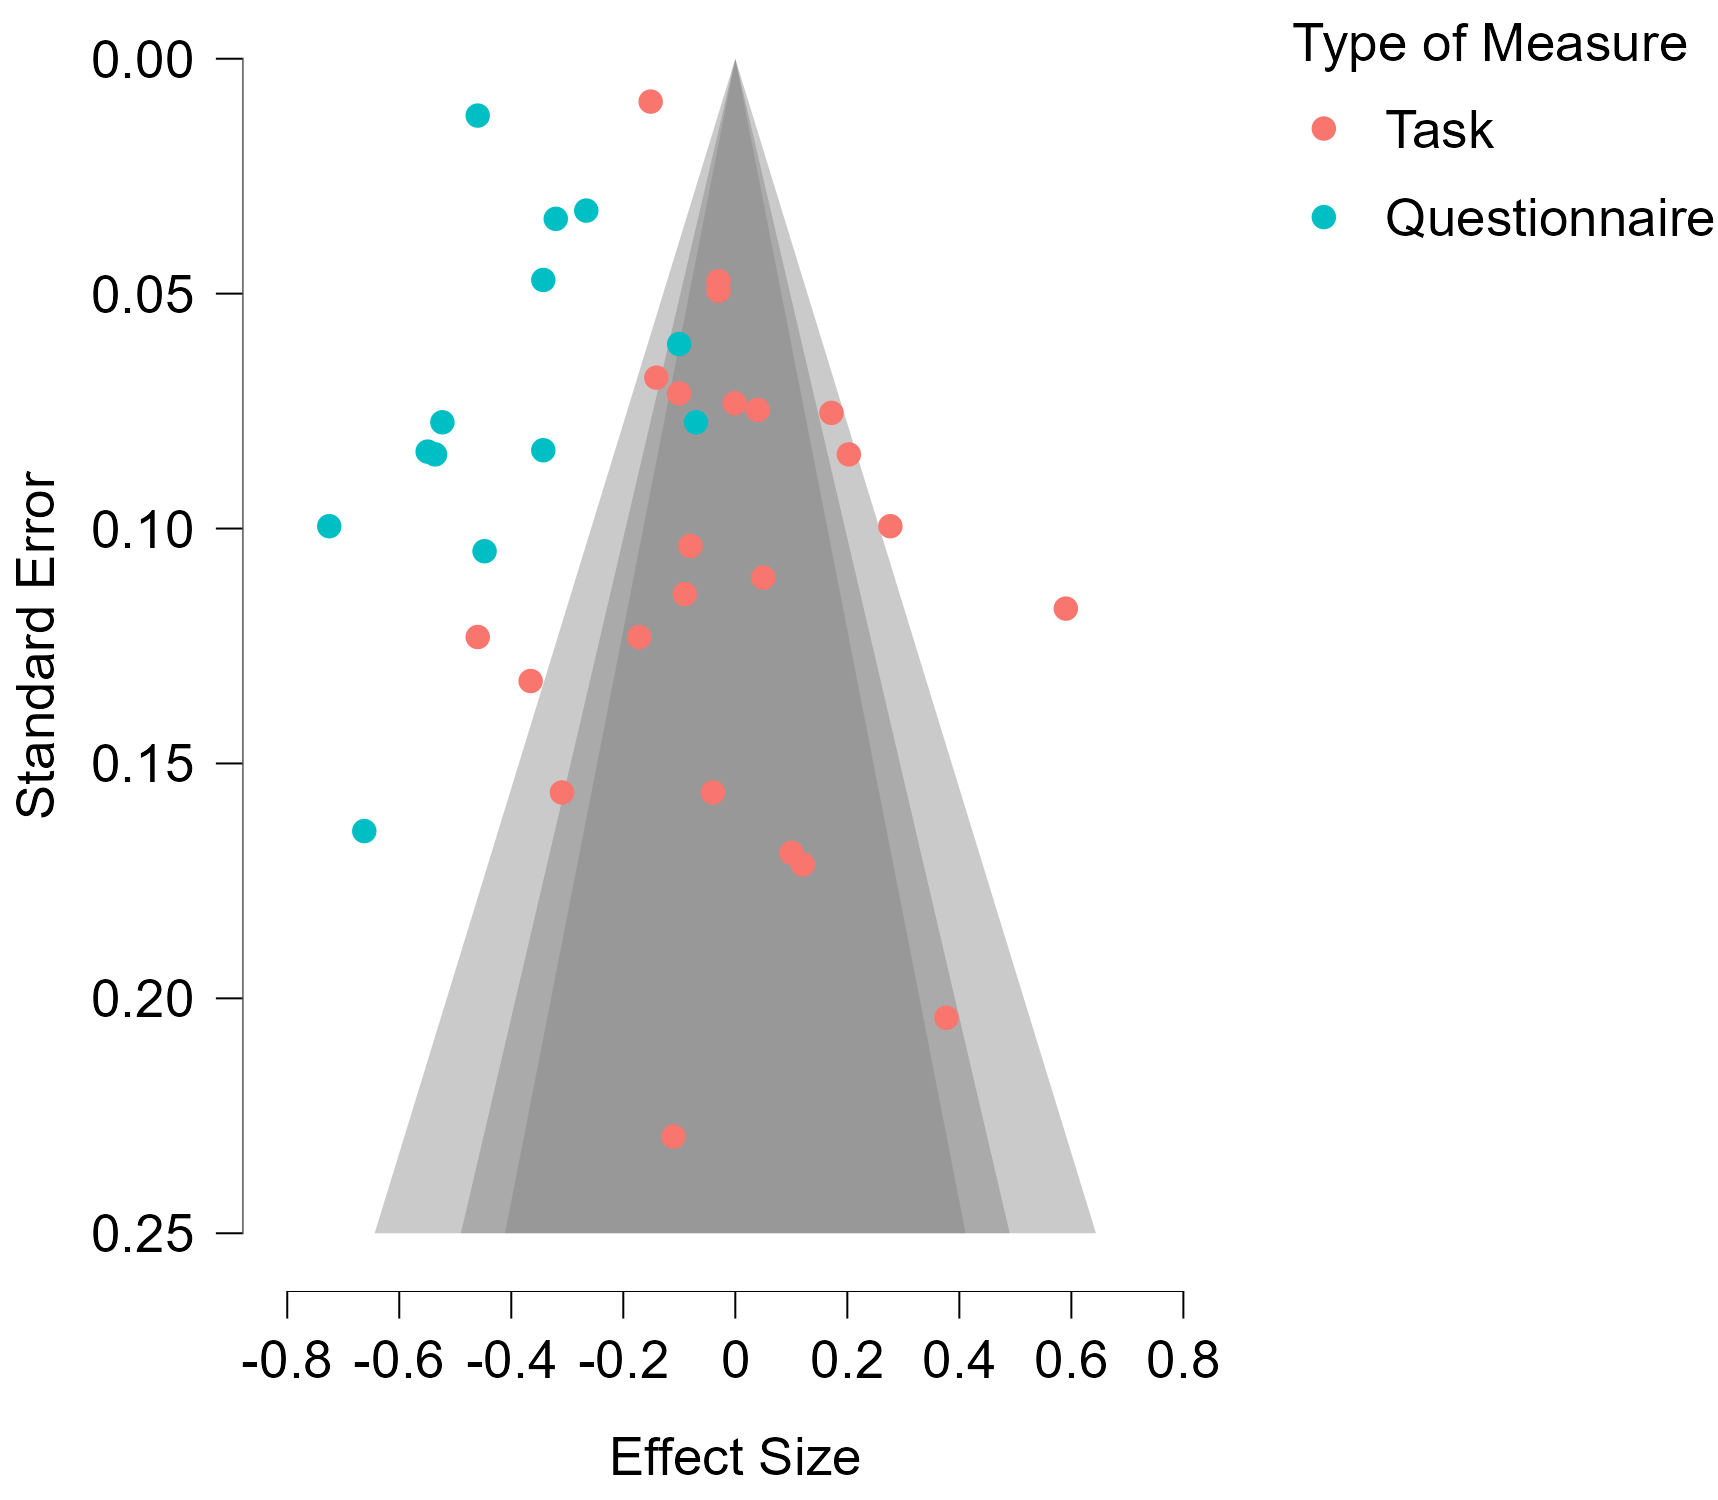


**Supplementary Figure 2**

*Funnel Plot for the Effect Sizes of the Relationships between Autistic Traits and Working Memory*


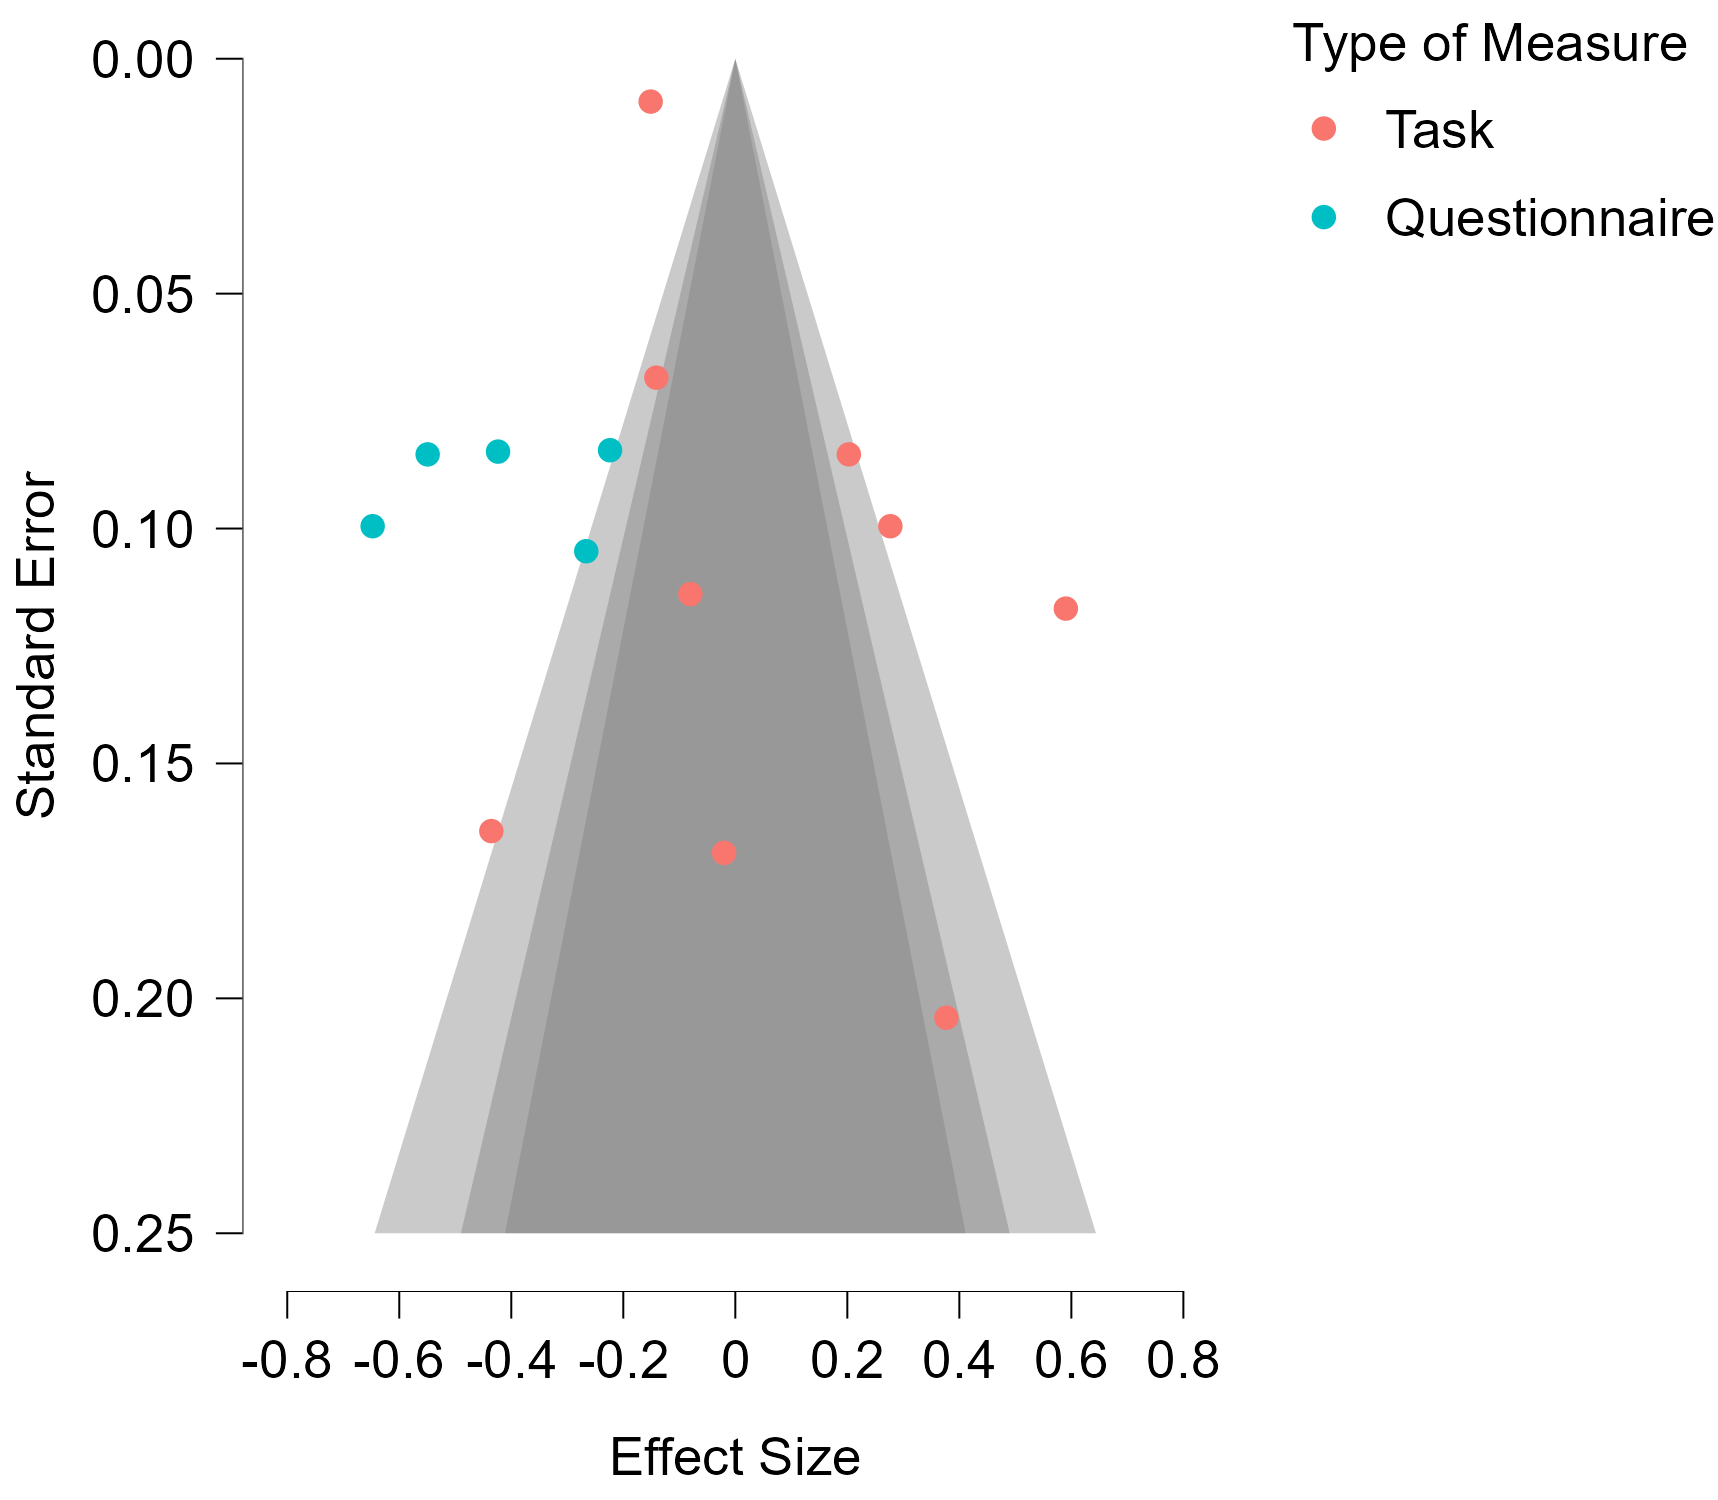


**Supplementary Figure 3**

*Funnel Plot for the Effect Sizes of the Relationships between Autistic Traits and Inhibition*


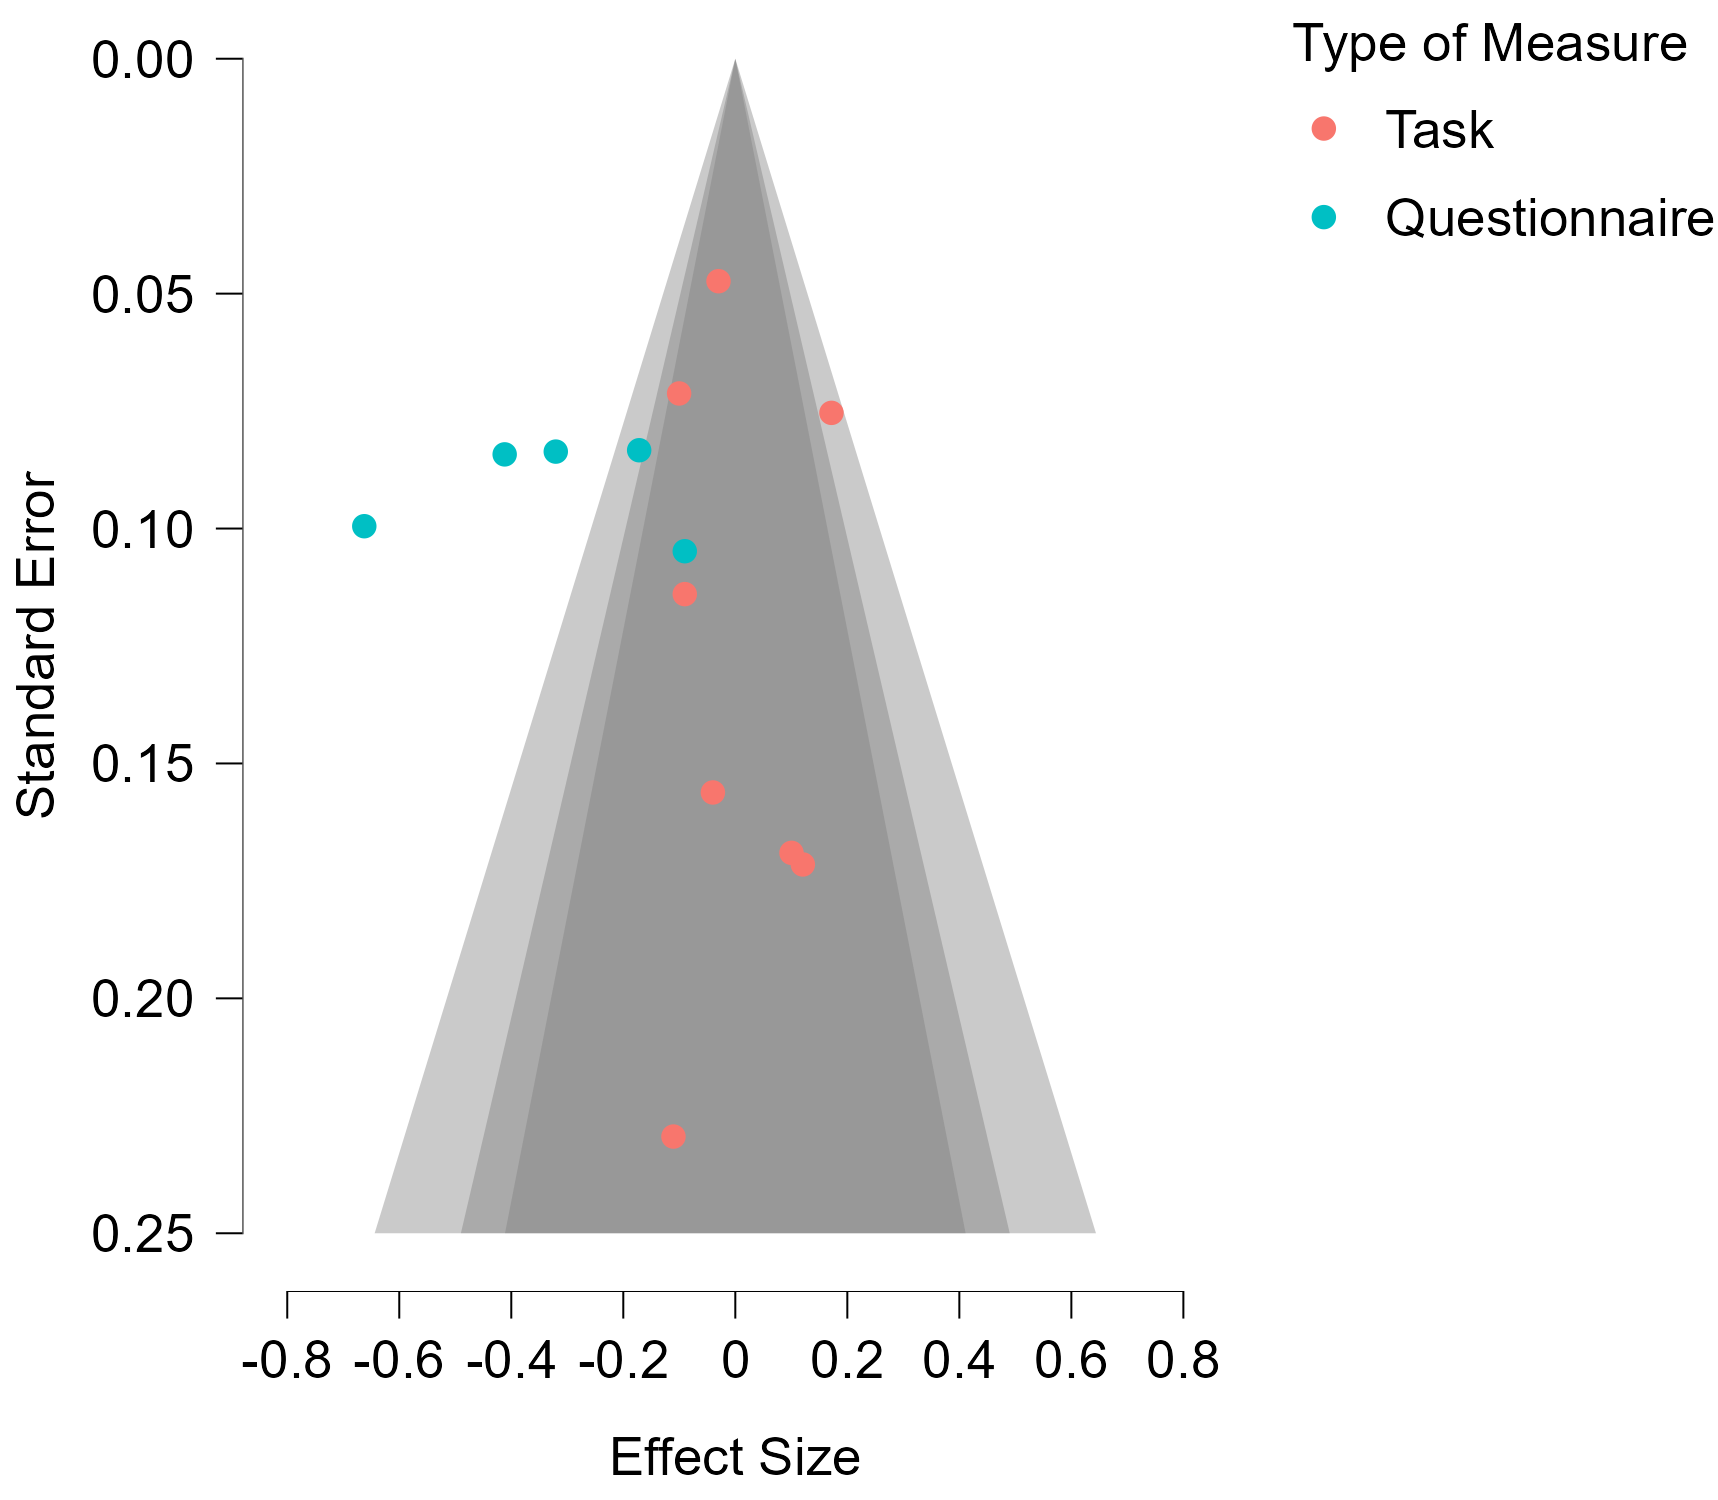


**Supplementary Figure 4**

*Funnel Plot for the Effect sizes of Relationship between Autistic Traits and Shifting*

**
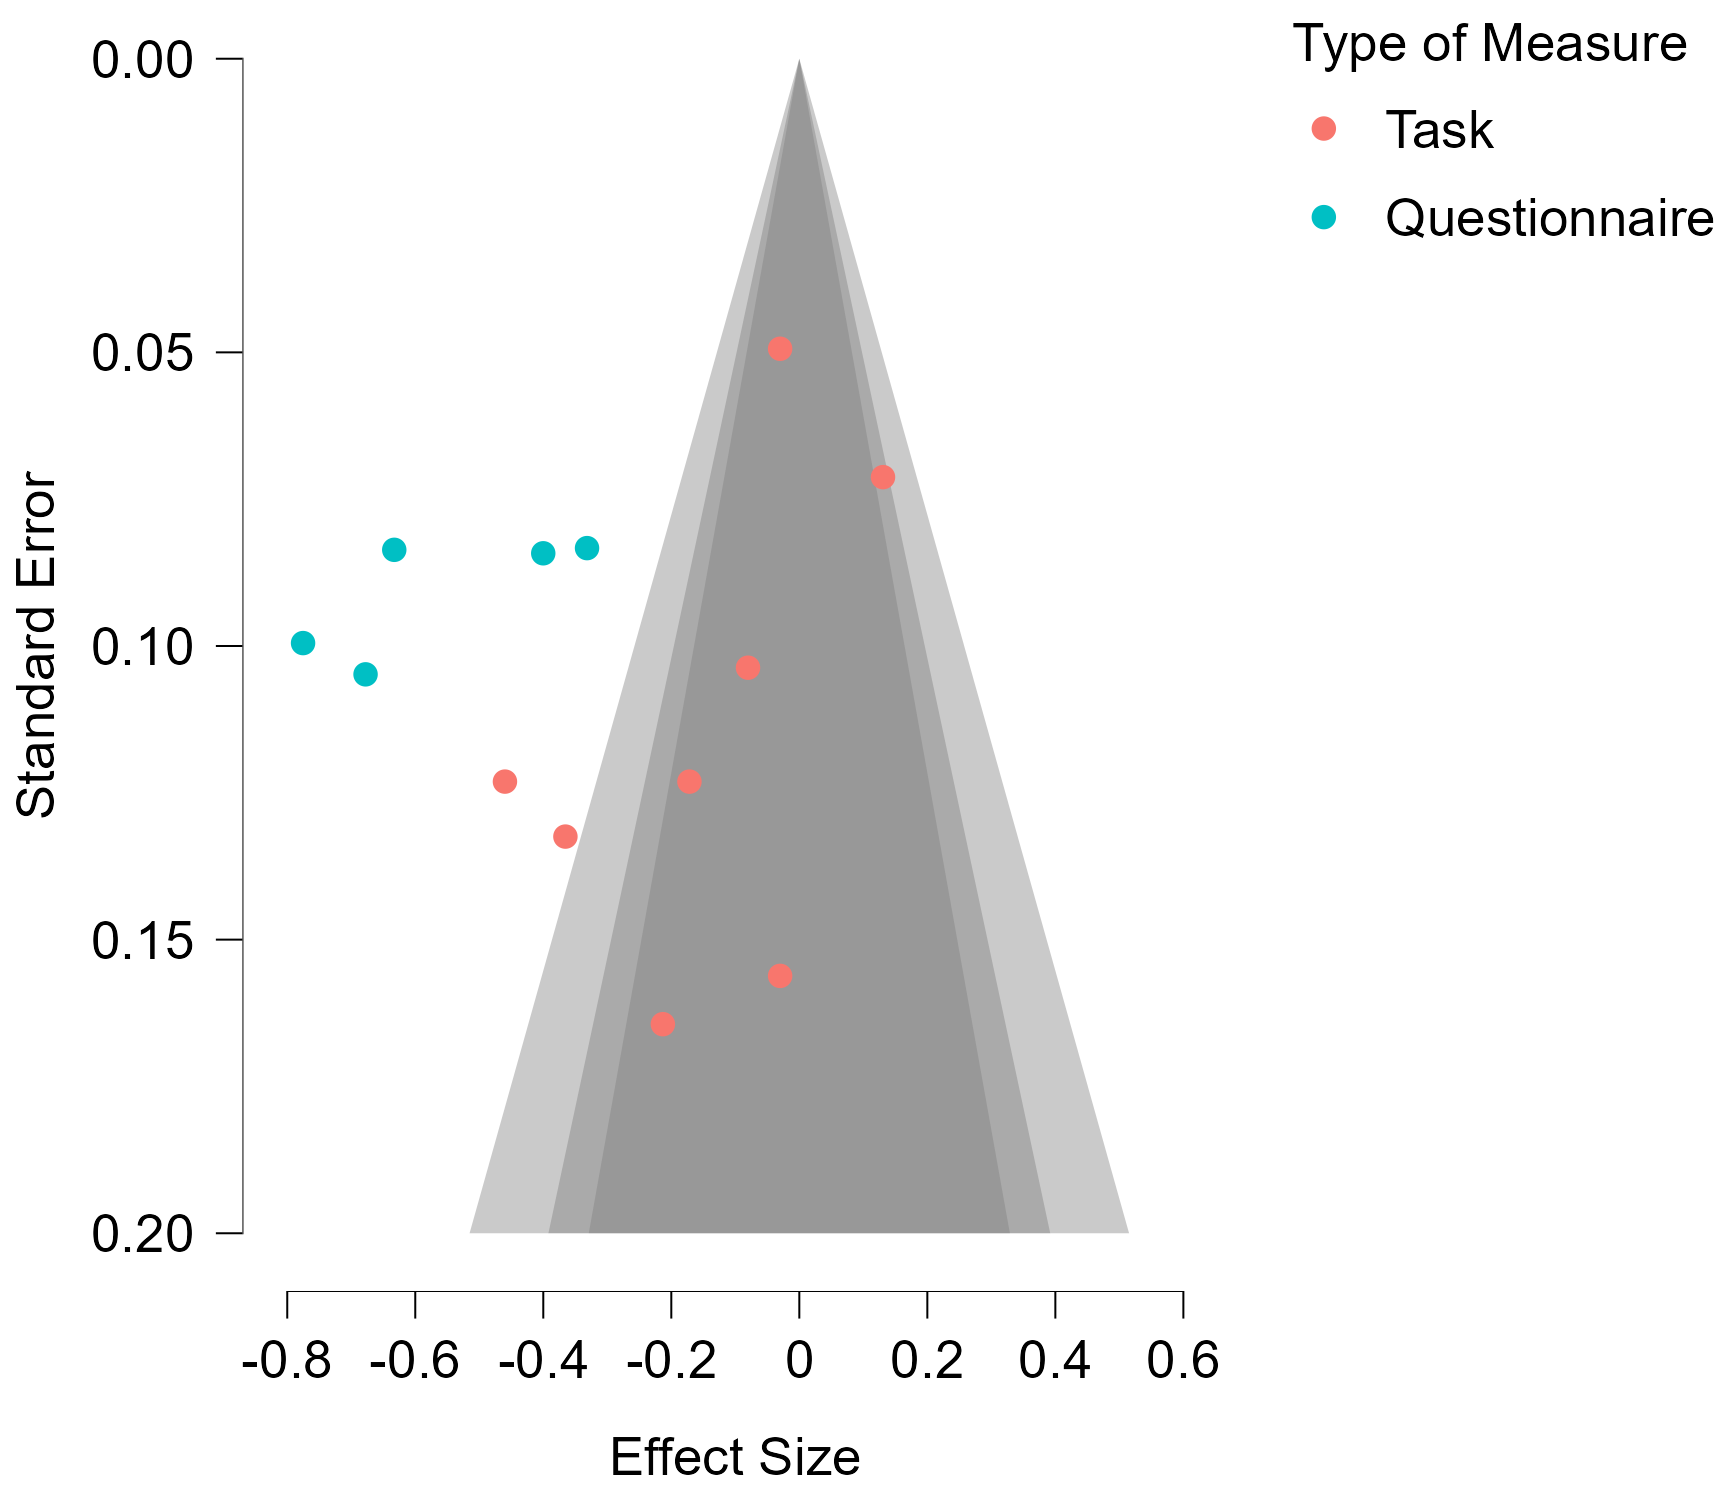
**

**Supplementary Figure 5**

*Forest Plot of the Random-Effects Meta-Analysis for the Relationship between Autistic Traits and Emotional Control*


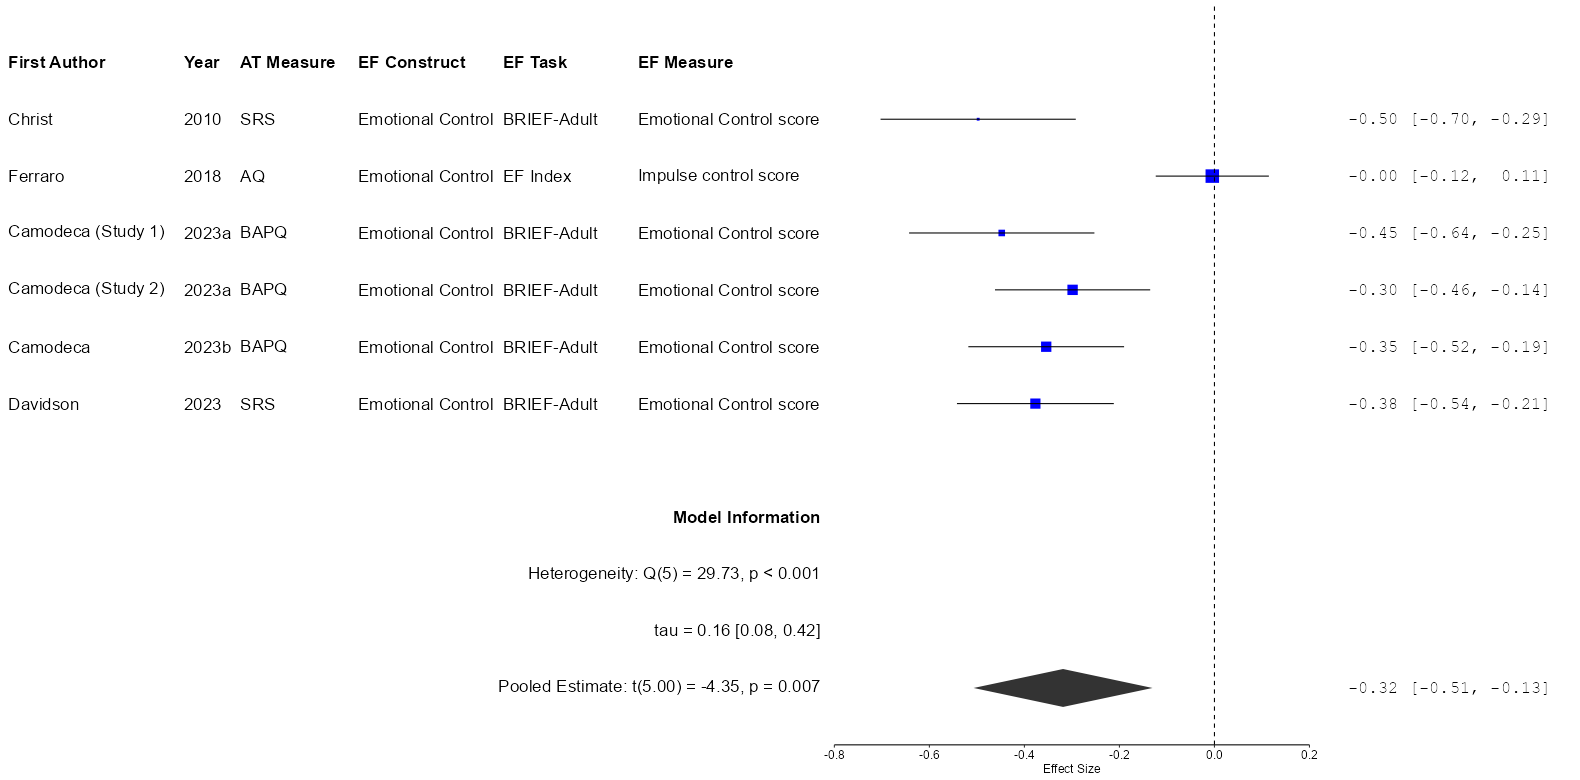


*Note*. AQ = Autism Spectrum Quotient; AT = Autistic traits; BAPQ = Broad Autism Phenotype Questionnaire; BRIEF = Behavior Rating Inventory of Executive Function; EF = executive function; SRS = Social Responsiveness Scale. The Fisher’s *z*-transformed correlation coefficients (*z*’) and 95% confidence intervals are displayed.

**Supplementary Figure 6**

*Forest Plot of the Random-Effects Meta-Analysis for the Relationship between Autistic Traits and Initiation*


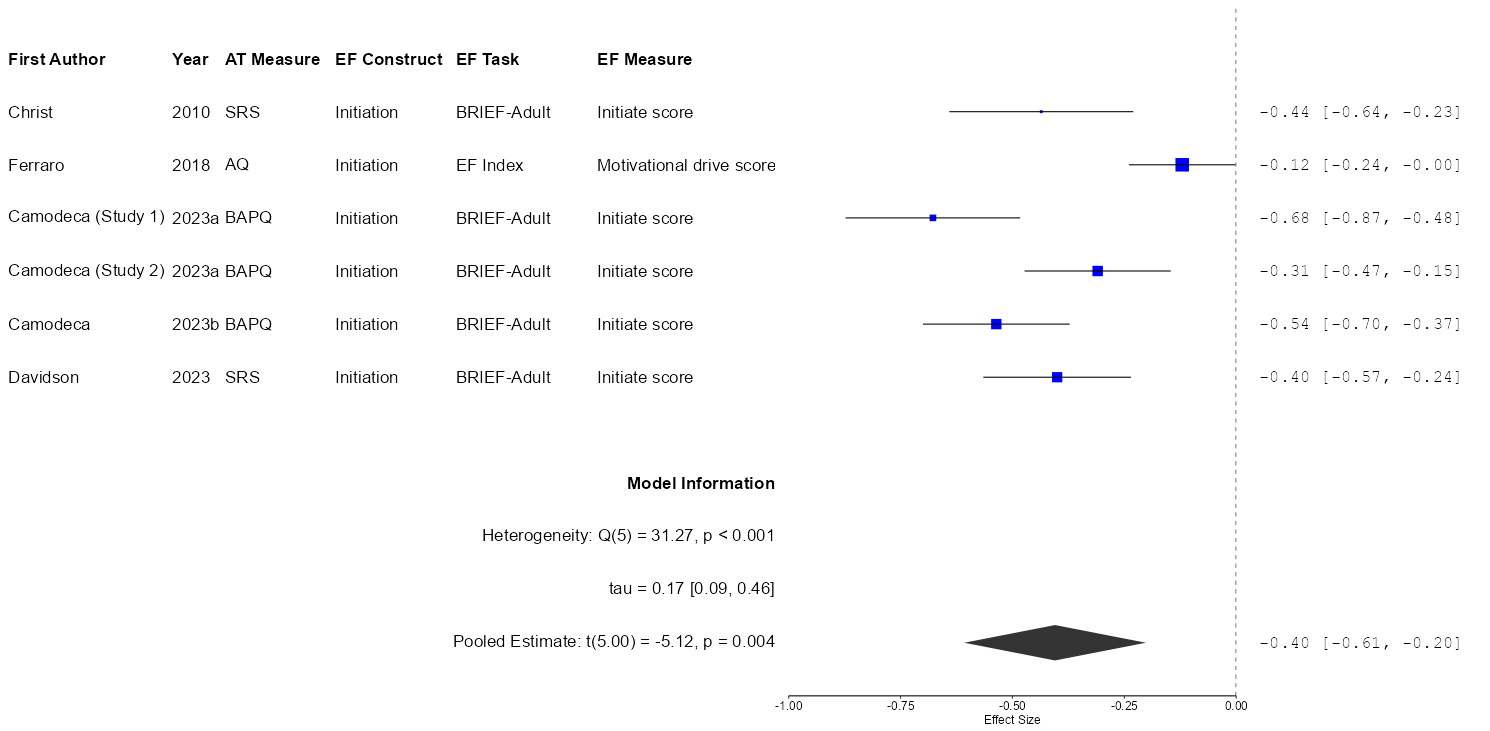


*Note*. AQ = Autism Spectrum Quotient; AT = Autistic traits; BAPQ = Broad Autism Phenotype Questionnaire; BRIEF = Behavior Rating Inventory of Executive Function; EF = executive function; SRS = Social Responsiveness Scale. The Fisher’s *z*-transformed correlation coefficients (*z*’) and 95% confidence intervals are displayed. The blue color indicates questionnaire measures.

**Supplementary Figure 7**

*Forest Plot of the Random-Effects Meta-Analysis for the Relationship between Autistic Traits and Planning*


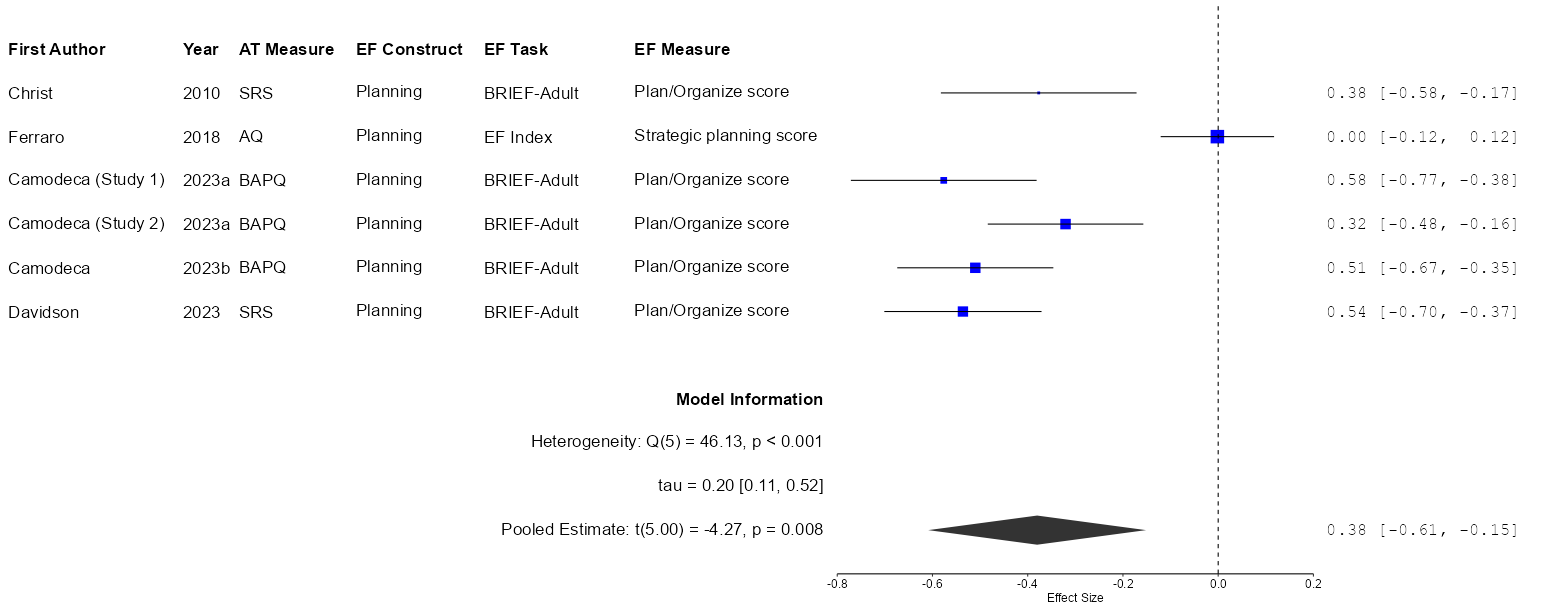


*Note*. AQ = Autism Spectrum Quotient; AT = Autistic traits; BAPQ = Broad Autism Phenotype Questionnaire; BRIEF = Behavior Rating Inventory of Executive Function; EF = executive function; SRS = Social Responsiveness Scale. The Fisher’s *z*-transformed correlation coefficients (*z*’) and 95% confidence intervals are displayed. The blue color indicates questionnaire measures.

**Supplementary Figure 8**

*Forest Plot of the Random-Effects Meta-Analysis for the Relationship between Autistic Traits and Monitoring*

*
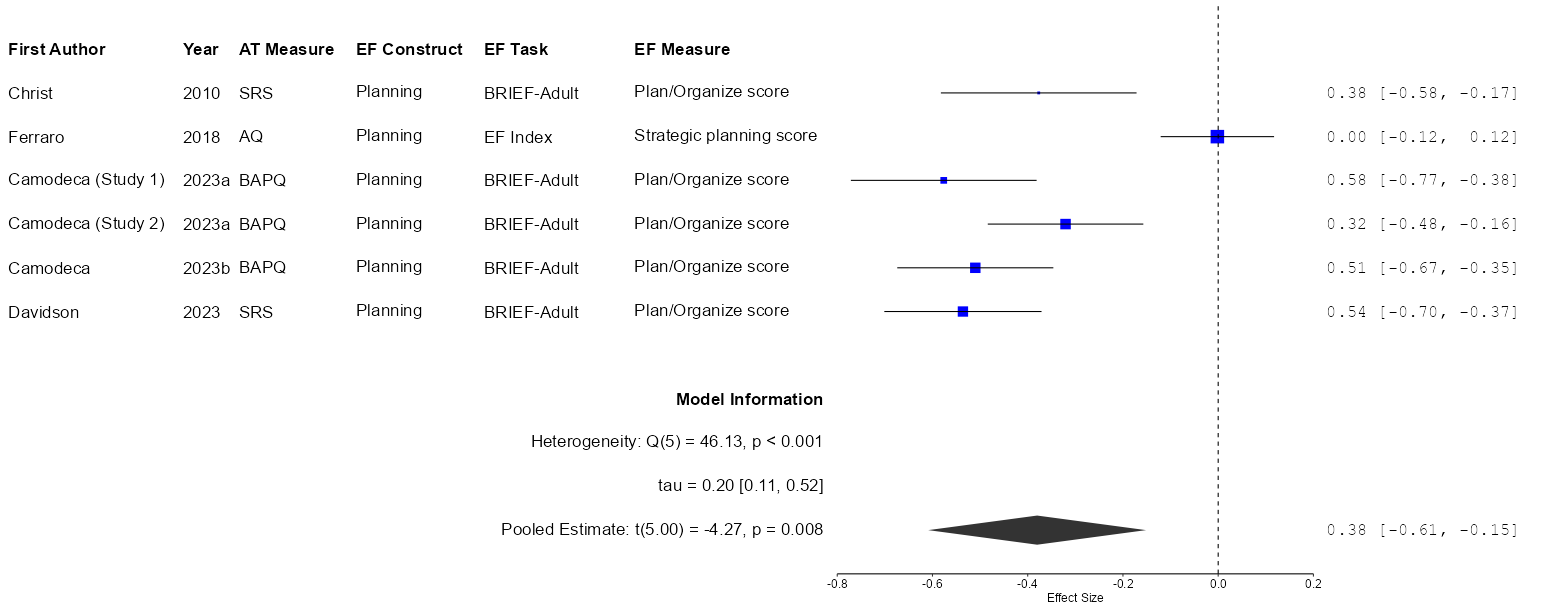
*

*Note*. AQ = Autism Spectrum Quotient; AT = Autistic traits; BAPQ = Broad Autism Phenotype Questionnaire; BRIEF = Behavior Rating Inventory of Executive Function; EF = executive function; SRS = Social Responsiveness Scale. The Fisher’s *z*-transformed correlation coefficients (*z*’) and 95% confidence intervals are displayed. The blue color indicates questionnaire measures.

**Supplementary Figure 9**

*Forest Plot of the Random-Effects Meta-Analysis for the Relationship between Autistic Traits and Reasoning*


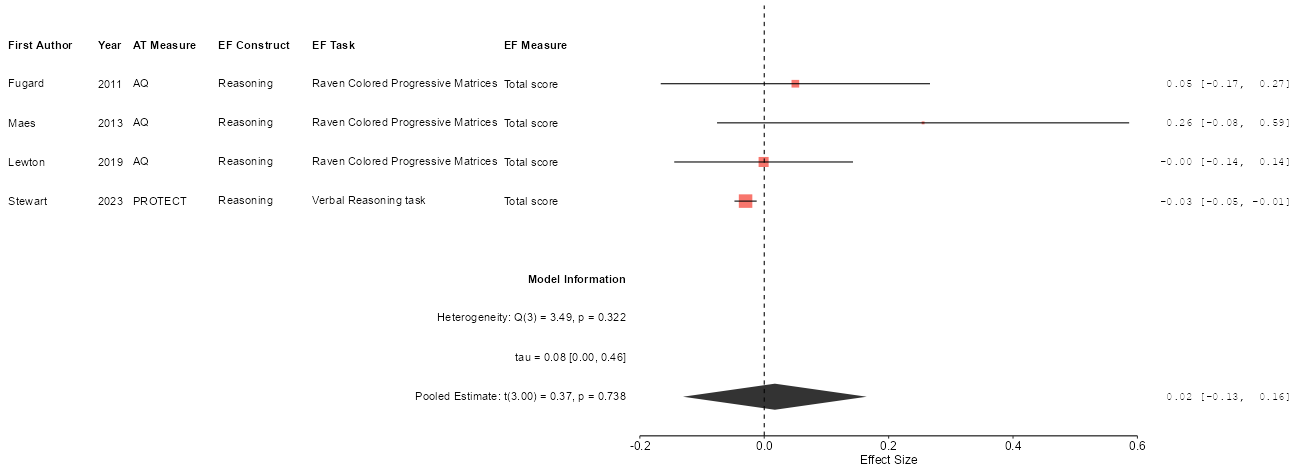


*Note*. AQ = Autism Spectrum Quotient; AT = Autistic traits; EF = executive function; PROTECT = PROTECT AST screener questions. The Fisher’s *z*-transformed correlation coefficients (*z*’) and 95% confidence intervals are displayed. The red color indicates task measures.

**Supplementary Figure 10**

*Forest Plot of the Random-Effects Meta-Analysis for the Relationship between Autistic Traits and Verbal Fluency*


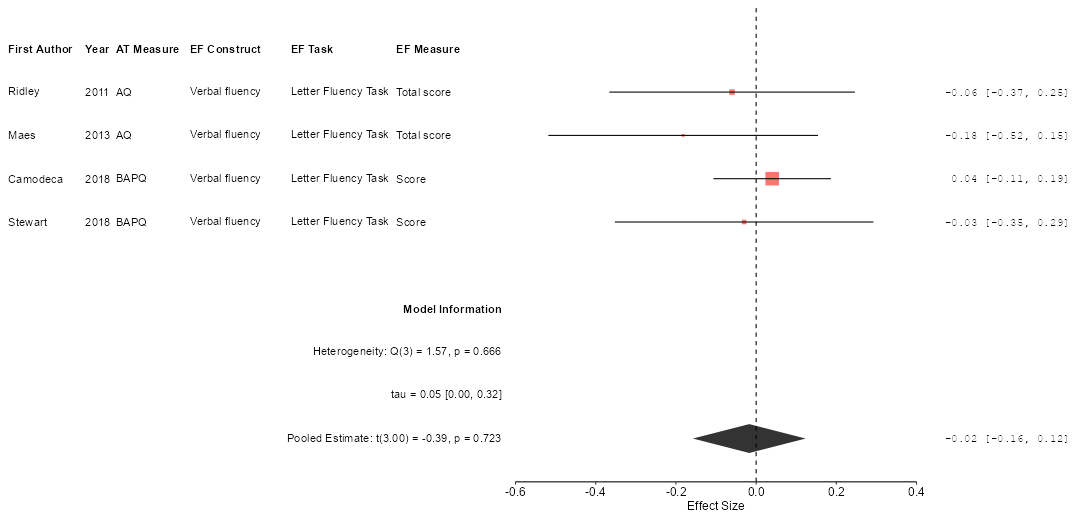


*Note*. AQ = Autism Spectrum Quotient; AT = Autistic traits; BAPQ = Broad Autism Phenotype Questionnaire; EF = executive function. The Fisher’s *z*-transformed correlation coefficients (*z*’) and 95% confidence intervals are displayed. The red color indicates task measures.
